# Supplementary material
Source: PubMed Central journal article supplement (PMC1665365)
Supplement: jphysiol_2004.075051_3.pdf [file jphysiol_2004.075051_3.pdf]

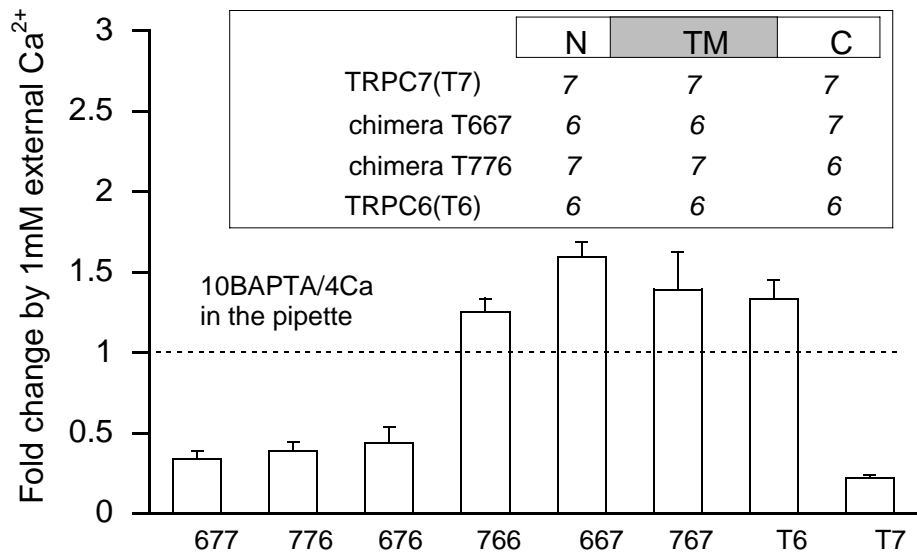

A

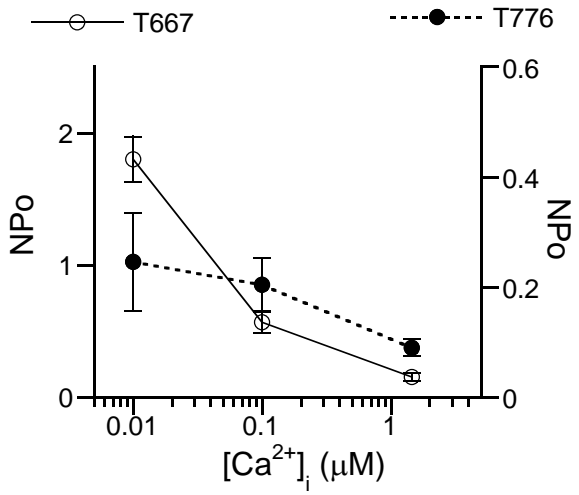

B

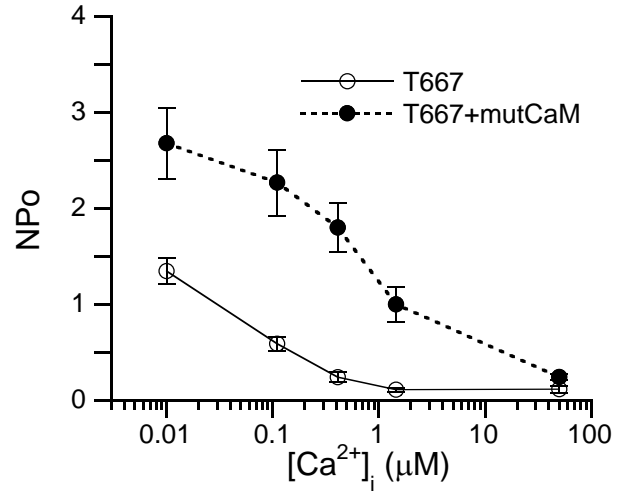

C

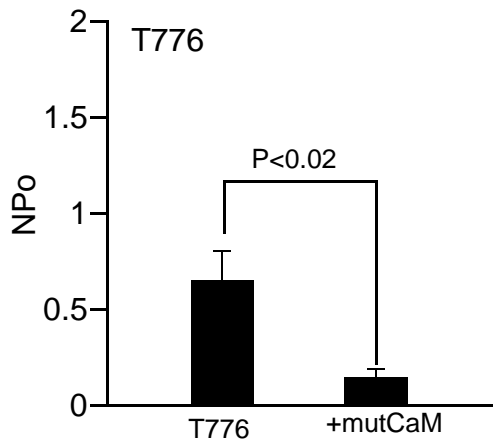

D

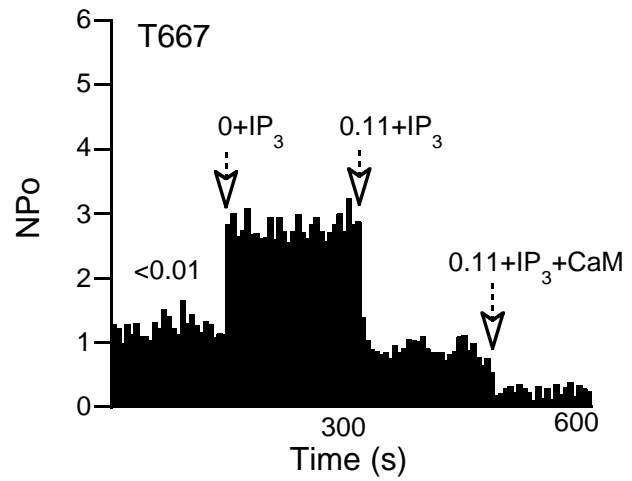

### Supplementary Figure 3

hTRPC5 (542-601) YETRAIDEPNNCKGIRCEKQNNAFSTLFE<sup>E</sup>TLQSLFWSVFGLLNLYVTNVKARHE<sup>F</sup>T<sup>E</sup>EFVG  
mTRPC6 (644-703) FVAFMIGMFNLYSYYIGAKQNEAFTTV<sup>E</sup>ESFKTLFWAIFGLSE<sup>V</sup>KSVVINYNHKFI<sup>E</sup>NI<sup>G</sup>  
mTRPC7 (590-649) FVAFMIGMFNLYSYYRGAKYNPAFTTV<sup>E</sup>ESFKTLFWSIFGLSE<sup>V</sup>ISVVLKYD<sup>H</sup>KFI<sup>E</sup>NI<sup>G</sup>  
: : \* . \* . \* \* \*\* : \* : : : \* : : \* : : \* : : \* : : \* : : \* : : \* : : \* : : \*
