# Supplementary material
Source: PubMed Central journal article supplement (PMC1665365)
Supplement: jphysiol_2004.075051v2_1.pdf [file jphysiol_2004.075051v2_1.pdf]

## Supplementary material

### Supplementary Figure 1. Effects of $\text{Ca}^{2+}_o$ on TRPC6/7 chimeras

Relative changes (fold change; see Fig.1 legend for definition) by 1 mM  $\text{Ca}^{2+}_o$  in CCh-evoked currents recorded from six TRPC6/7 chimera-expressing cells ( $-60\text{mV}$ ). Conventional whole-cell recording (10BAPTA/4Ca-internal solution). The inset depicts the structural arrangement of chimeras, where N, TM and C denote the amino-terminus, transmembrane domain and carboxy terminus of TRPC channels, respectively.  $n = 5-10$ .

### Supplementary Figure 2. C-terminus determines the pattern of $\text{Ca}^{2+}_i$ response

I/O recording at  $-60\text{mV}$ . A; NPo- $[\text{Ca}^{2+}]_i$  relationships for two TRPC6/7 chimeras T667 ( $n=6$ ) and T776 ( $n = 10$ ). B; NPo- $[\text{Ca}^{2+}]_i$  relationships for T667 with or without mutCaM coexpression.  $n = 5$ . C; effects of mutCaM coexpression on T776 activity.  $[\text{Ca}^{2+}]_i$ :  $0.11\mu\text{M}$ .  $n = 5$ . D; typical NPo-time plot for CCh-activated T667 channels at different  $[\text{Ca}^{2+}]_i$ , with  $10\mu\text{M}$  IP<sub>3</sub> or  $1\mu\text{M}$  wild-type CaM.  $n = 6$ . P value: unpaired t-test.

### Supplementary Figure 3. CLUSTALW amino acid alignments of putative TM5-6 linker region between TRPC7, 6 and 5 channels

‘\*’, ‘:’ and ‘.’ denote the amino acid identity/similarity.

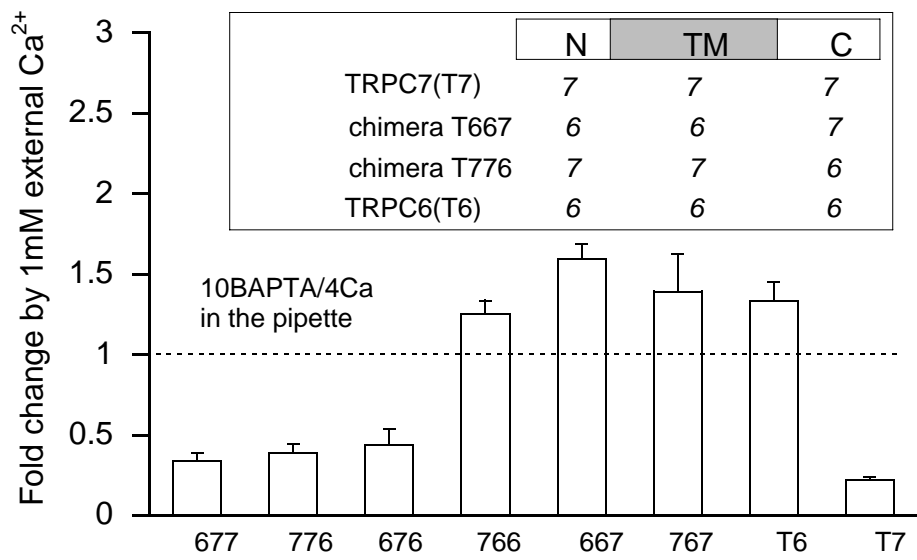

A

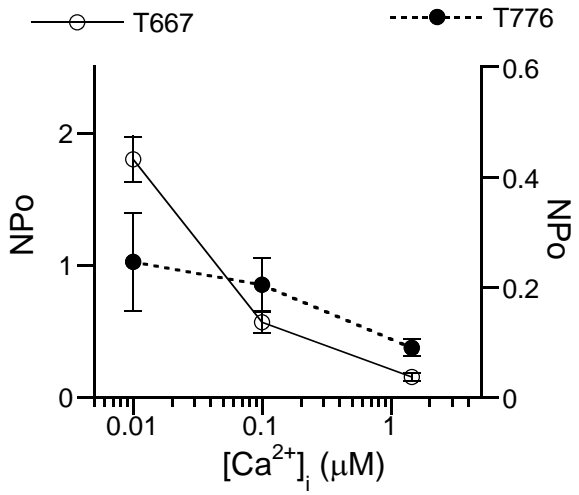

B

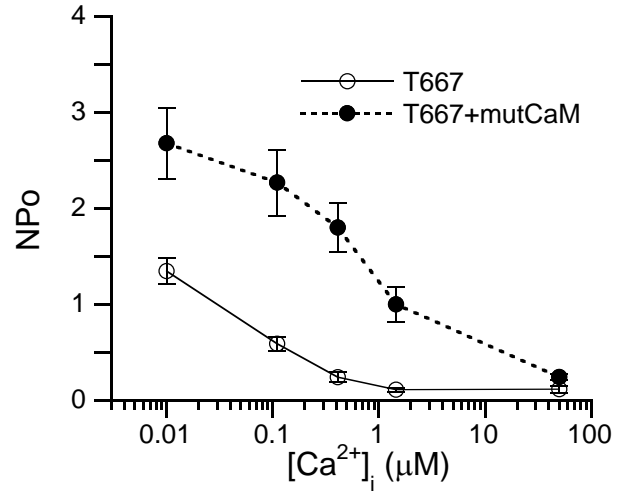

C

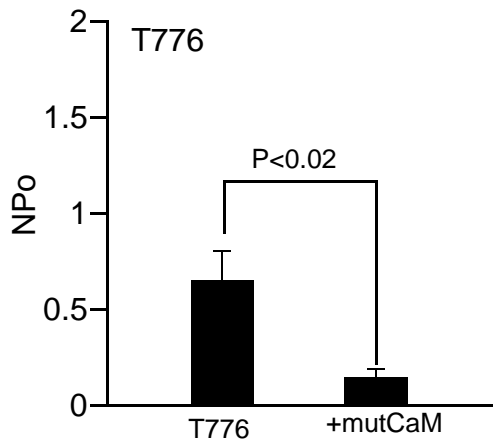

D

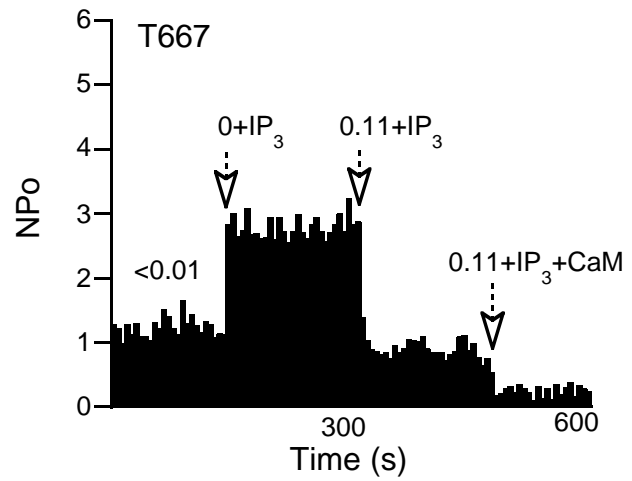

### Supplementary Figure 3

hTRPC5 (542-601) YETRAIDEPNNCKGIRCEKQNNAFSTLFE<sup>E</sup>TLQSLFWSVFGLLNLYVTNVKARHE<sup>F</sup>T<sup>E</sup>EFVG  
mTRPC6 (644-703) FVAFMIGMFNLYSYYIGAKQNEAFTTV<sup>E</sup>E<sup>S</sup>FKTLFWAIFGLSE<sup>V</sup>KSVVINYNHKFI<sup>E</sup>NI<sup>G</sup>  
mTRPC7 (590-649) FVAFMIGMFNLYSYYRGAKYNPAFTTV<sup>E</sup>E<sup>S</sup>FKTLFWSIFGLSE<sup>V</sup>ISVVLKYD<sup>H</sup>KFI<sup>E</sup>NI<sup>G</sup>  
: : \* . \* . \* \* \*\* : \* : \* : : \* : : \* : : \* : : \* : : \* : : \* : \*
