# Supplementary material
Source: PubMed Central journal article supplement (PMC1665365)

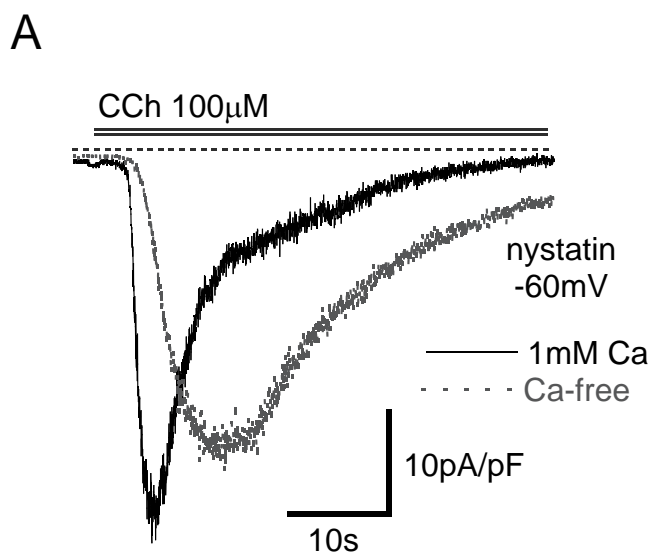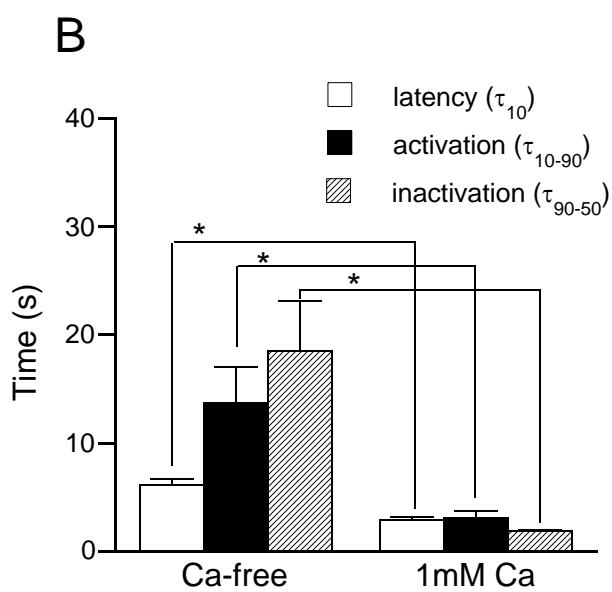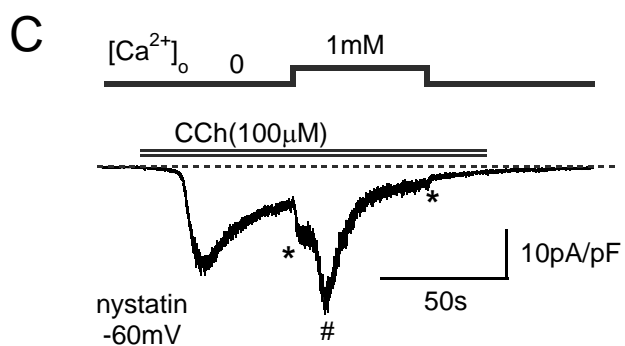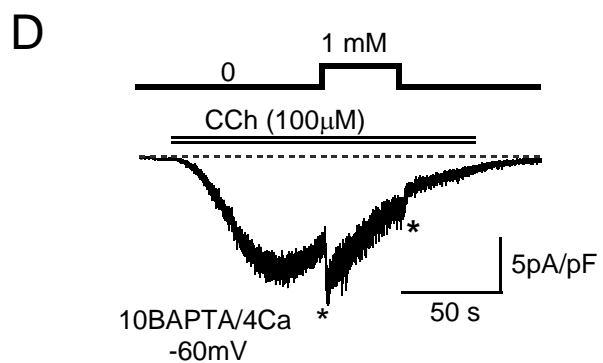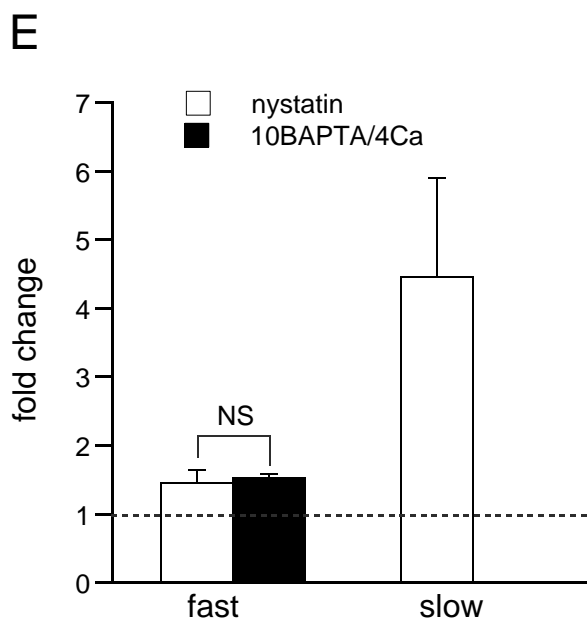

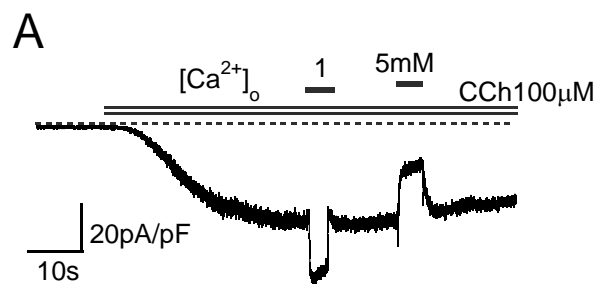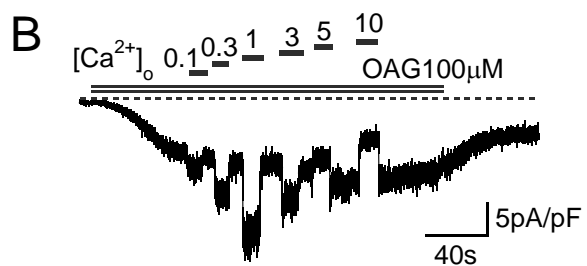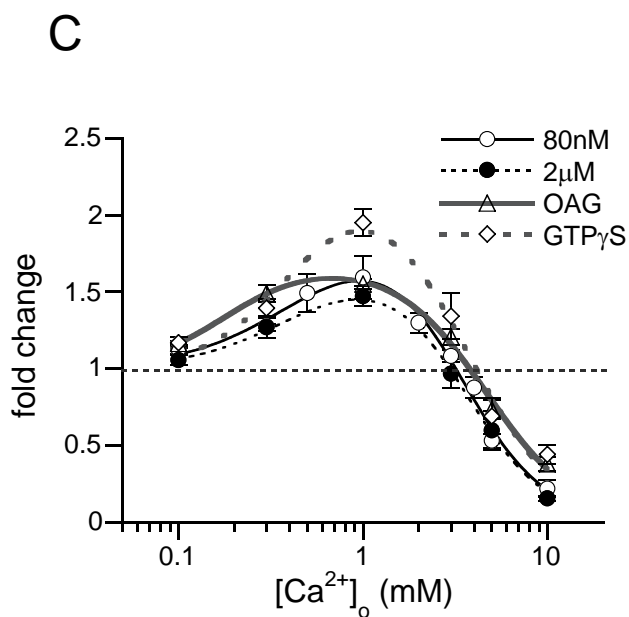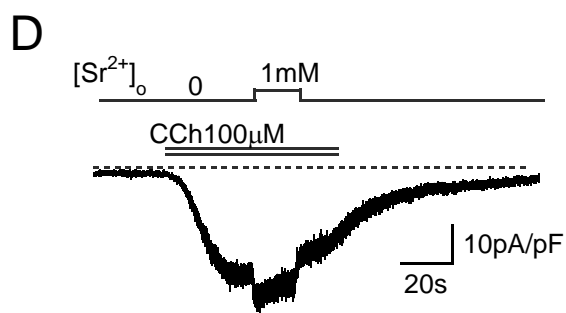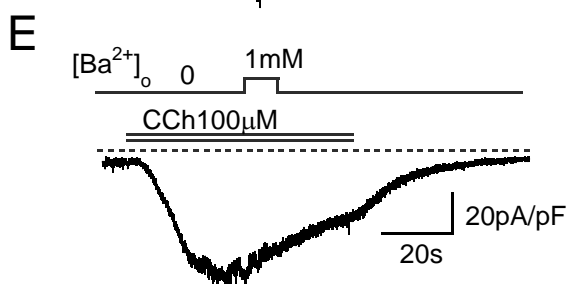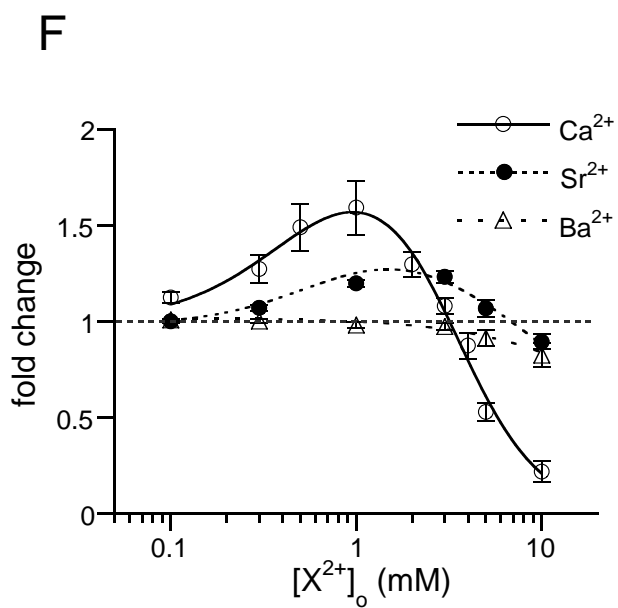

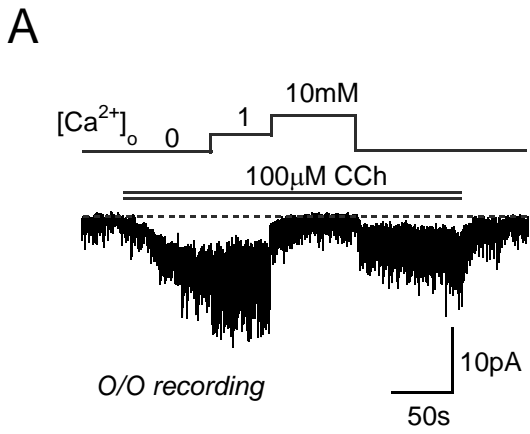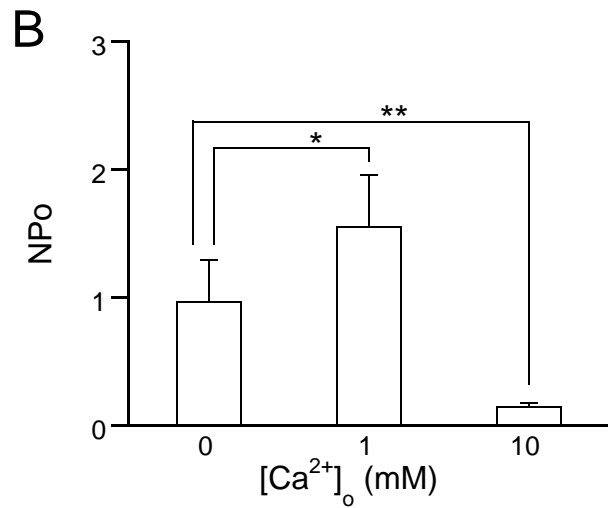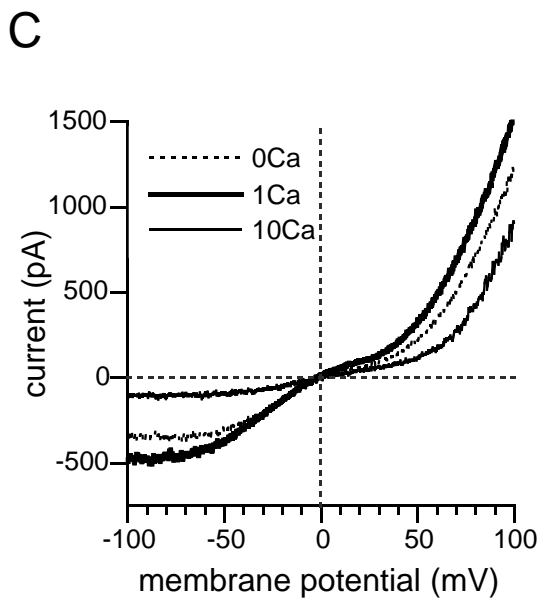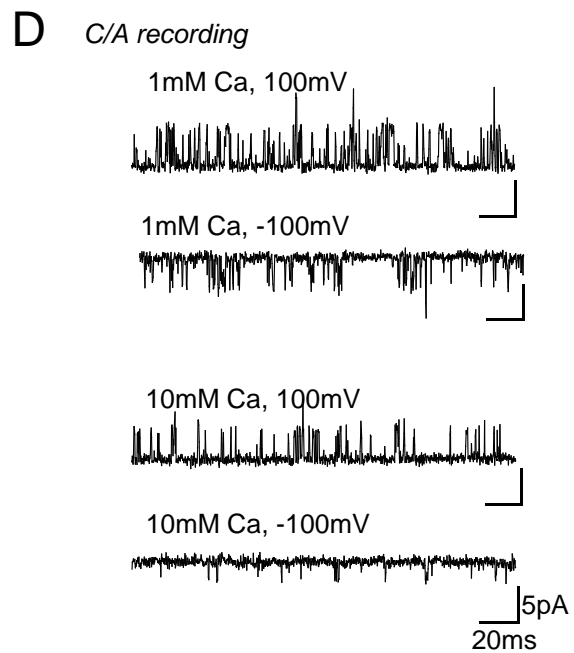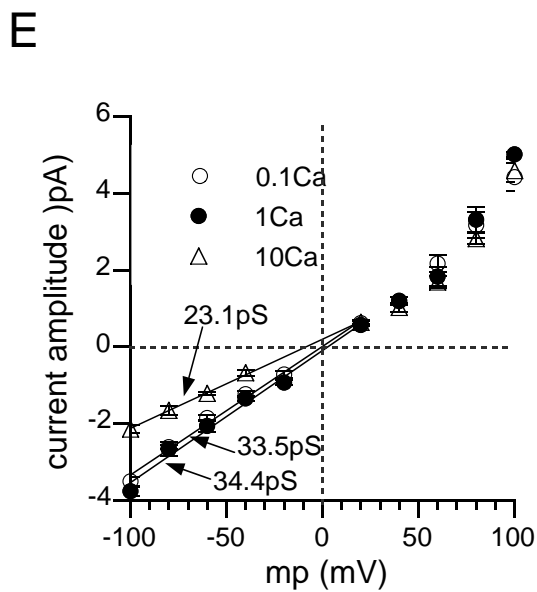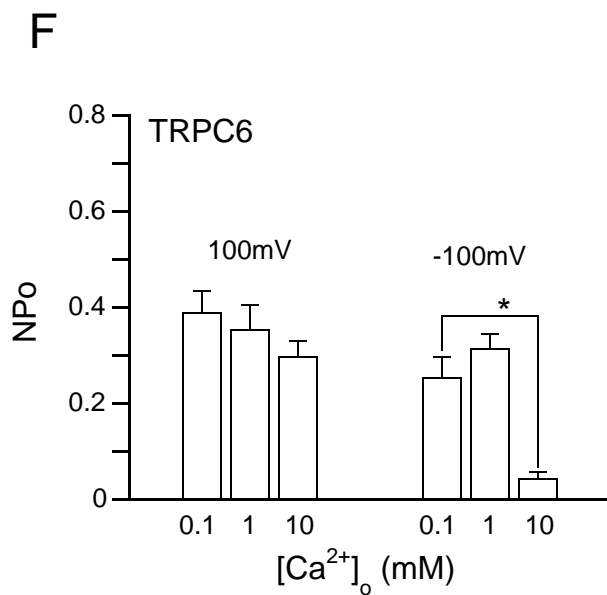

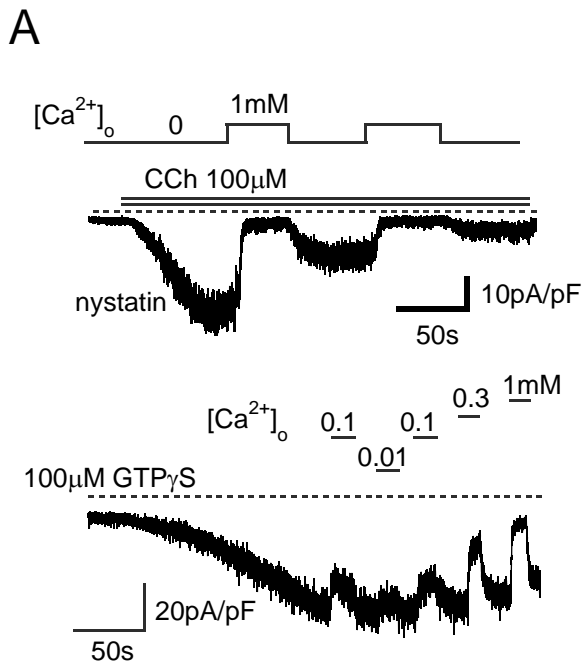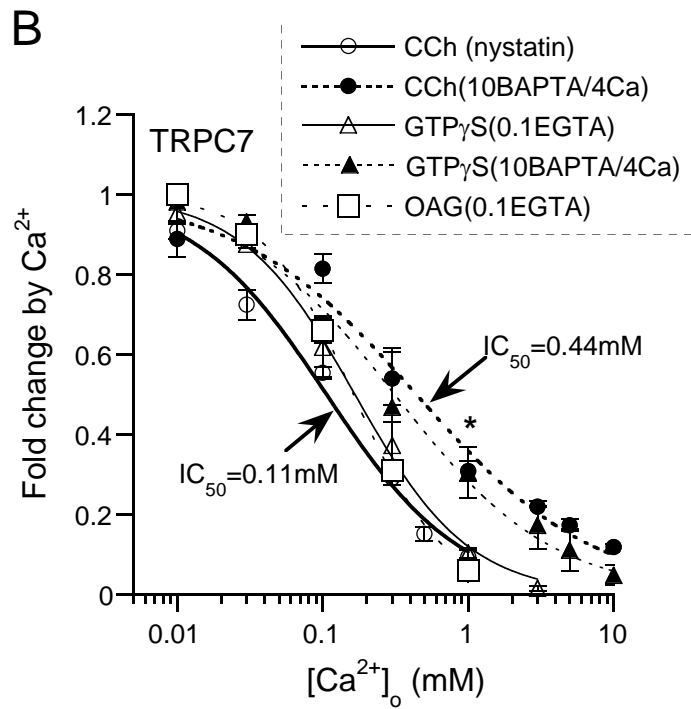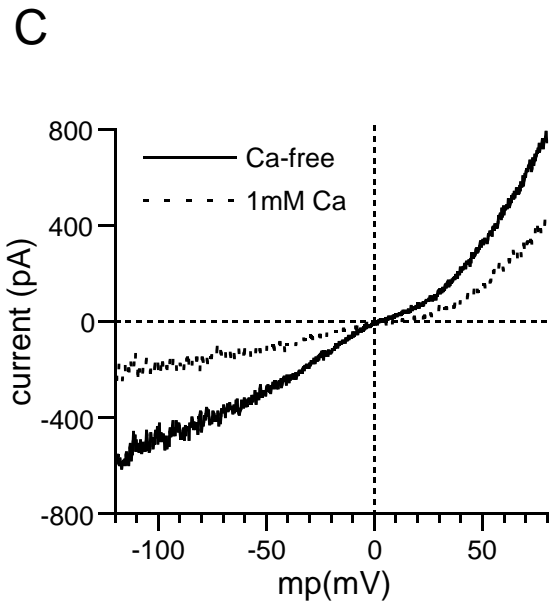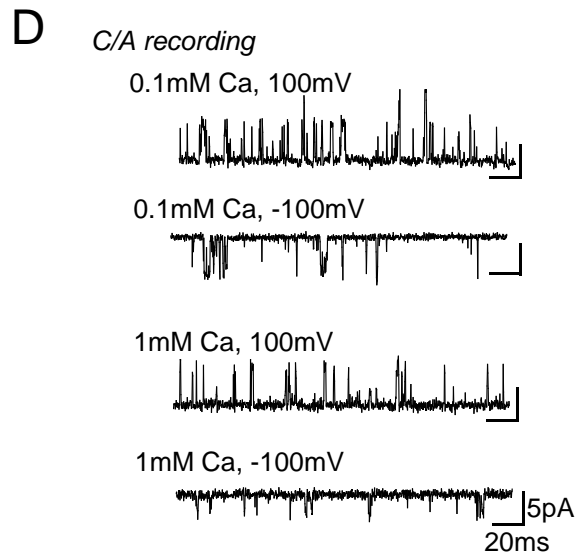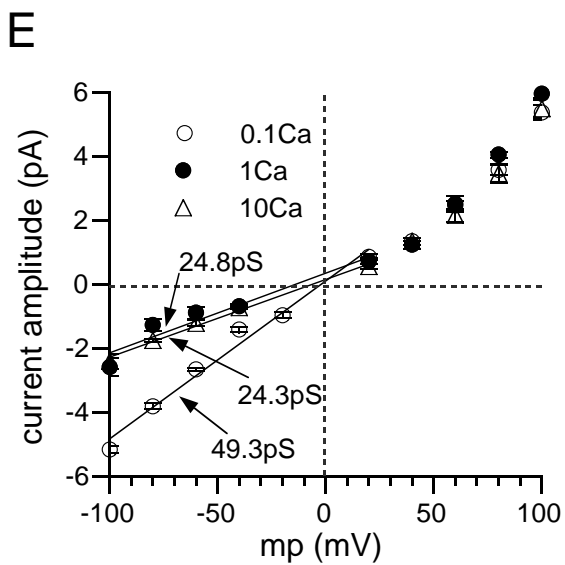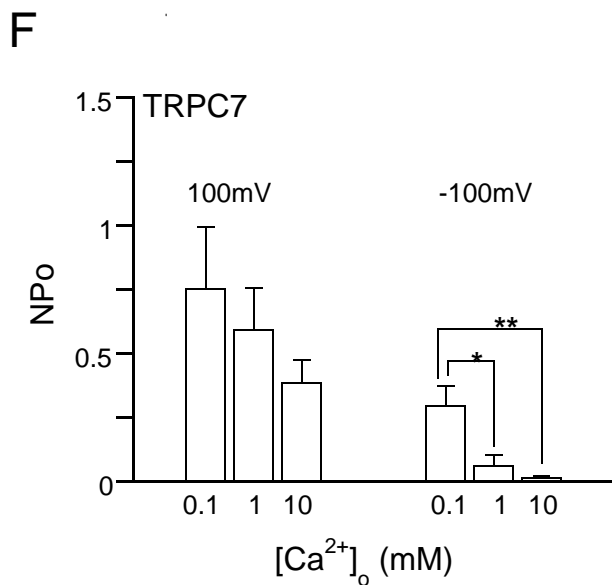

**A**

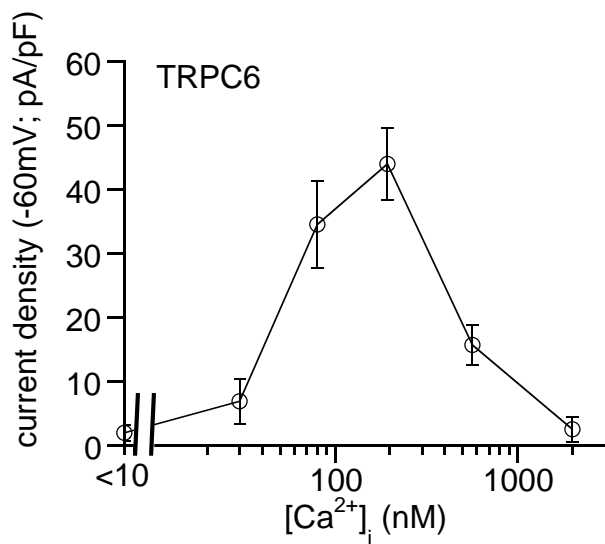

**B**

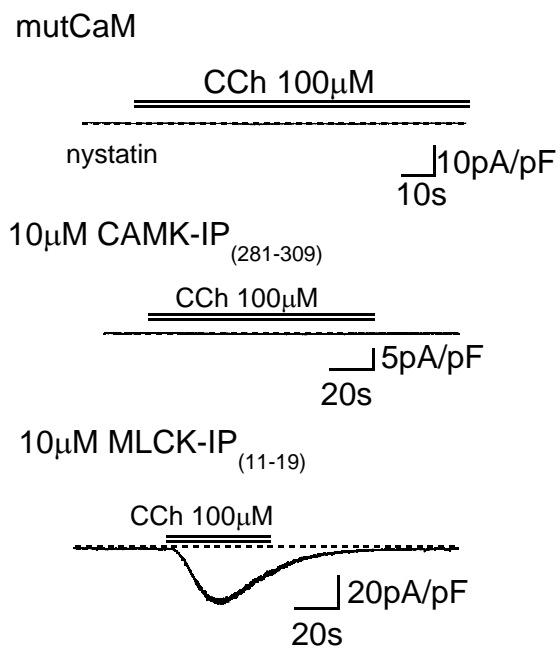

**C**

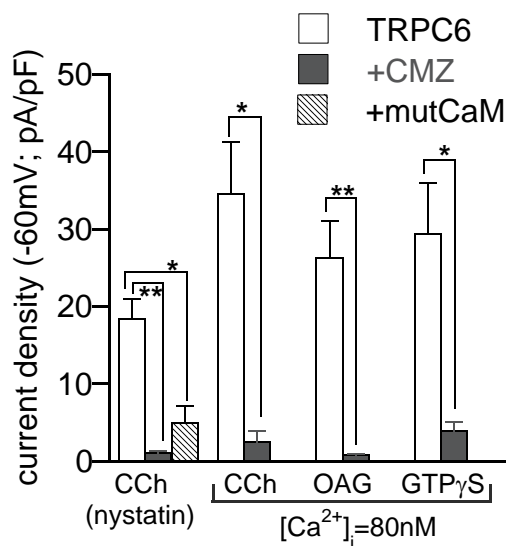

**D**

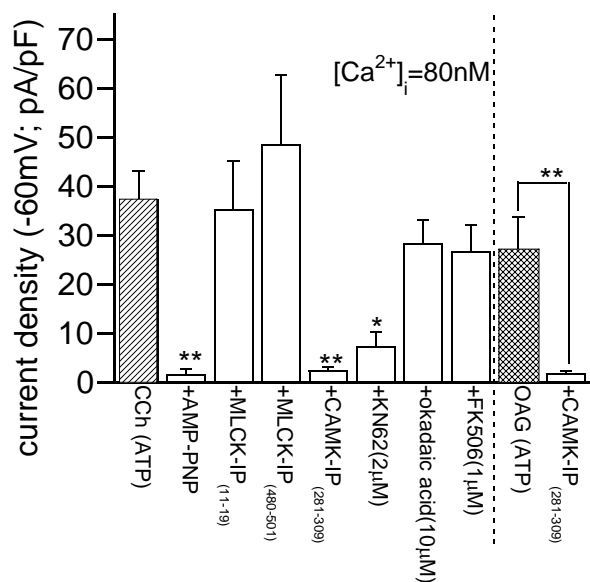

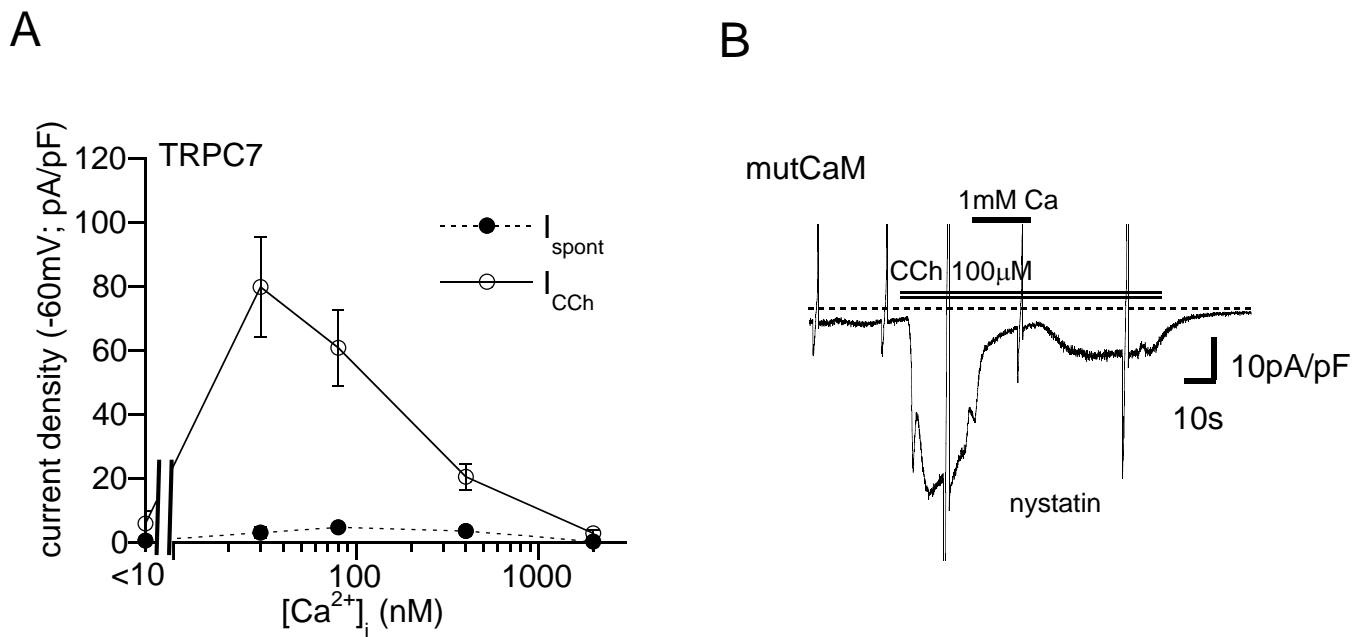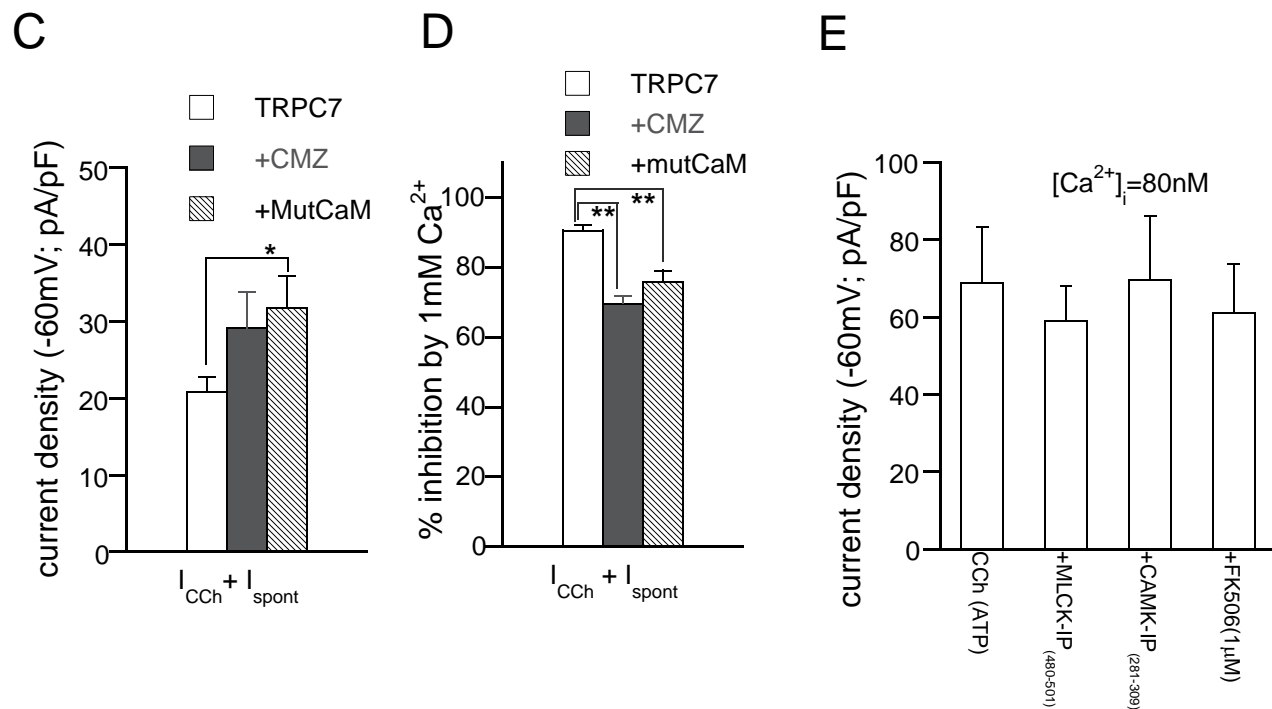

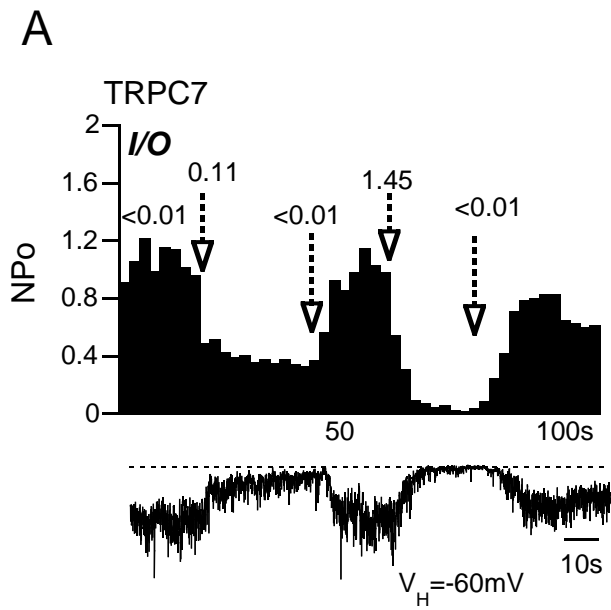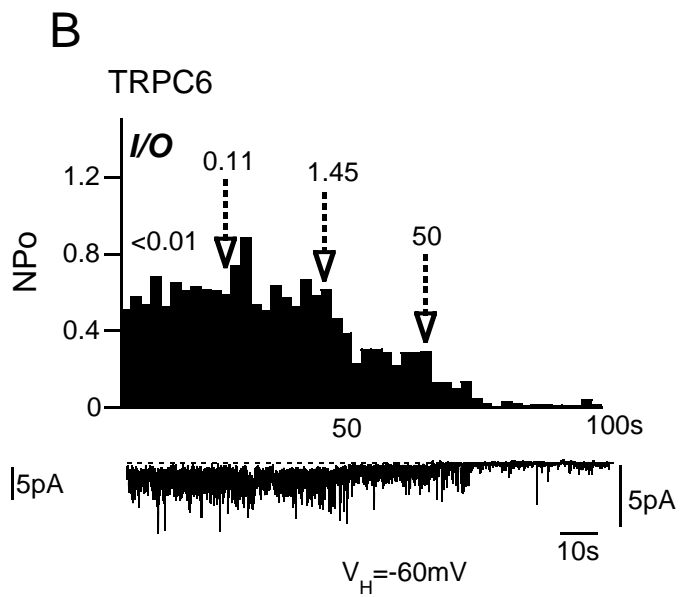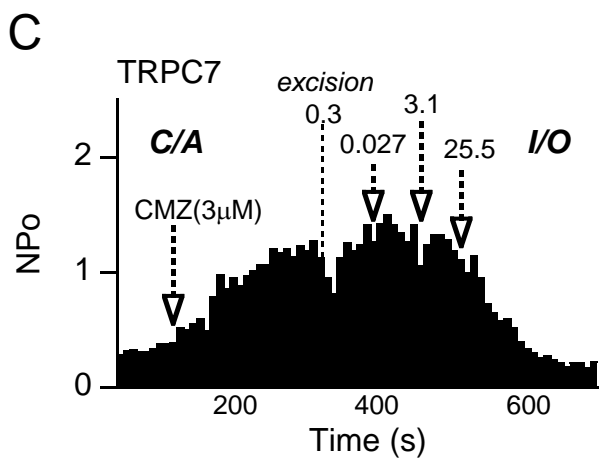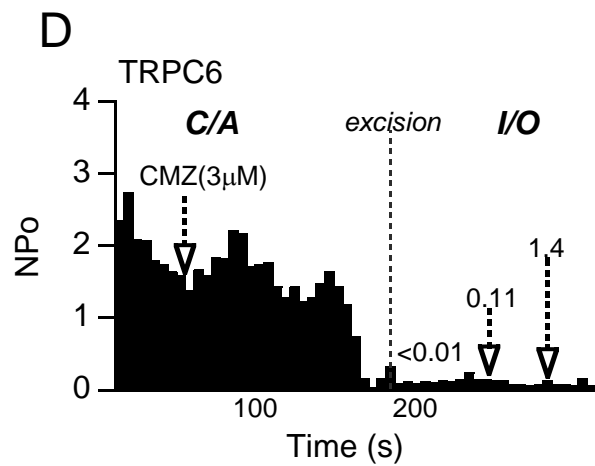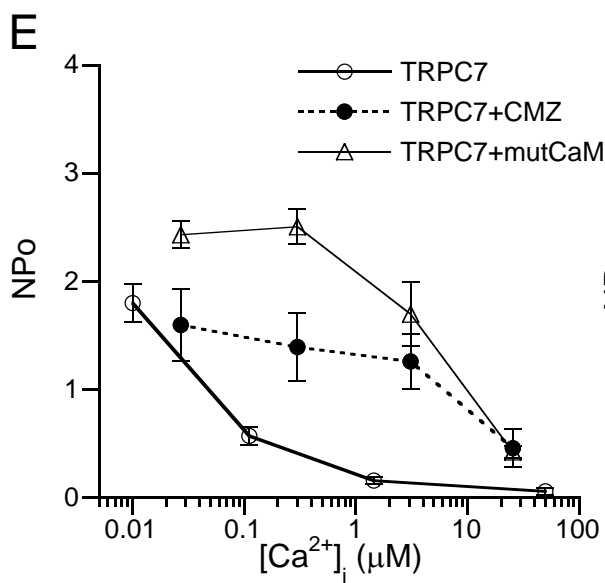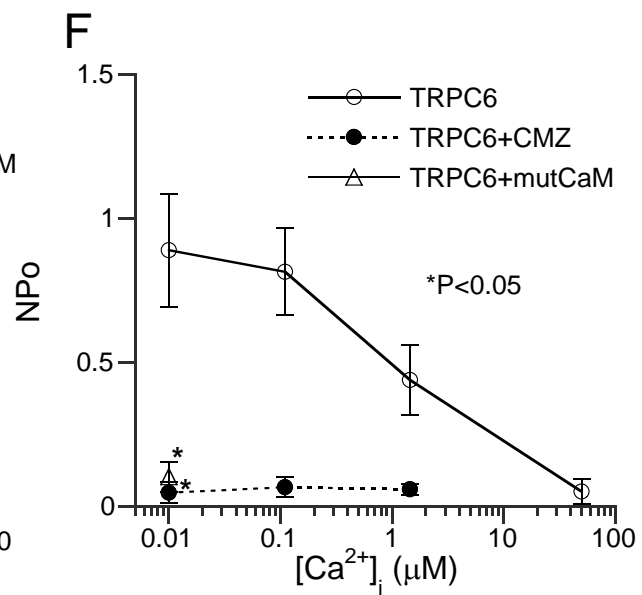

A

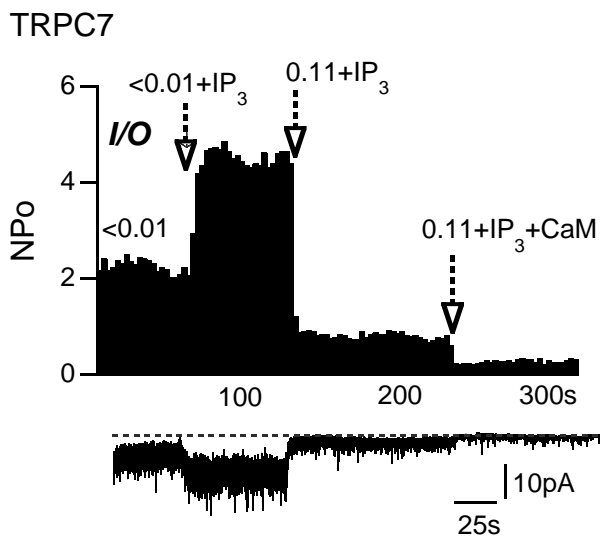

B

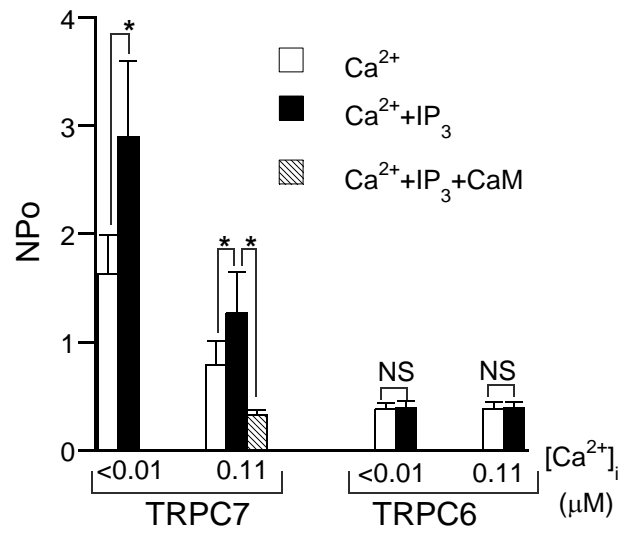

C

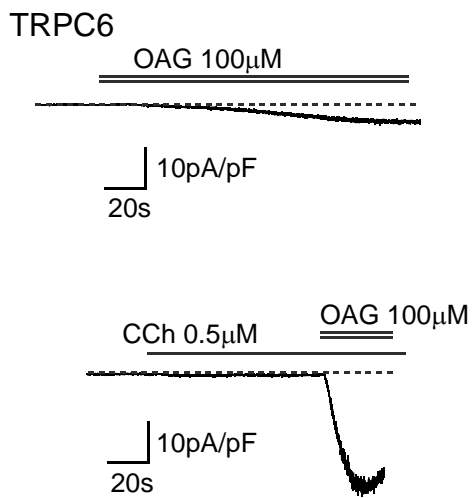

D

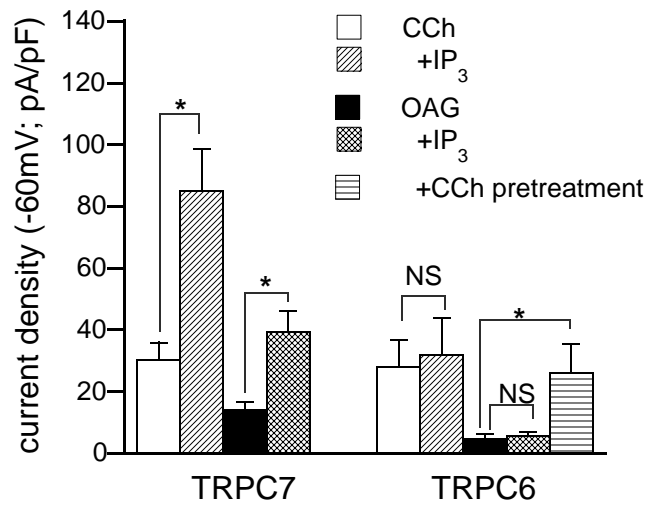



A

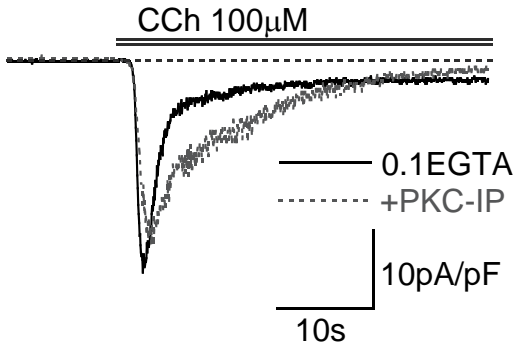

B

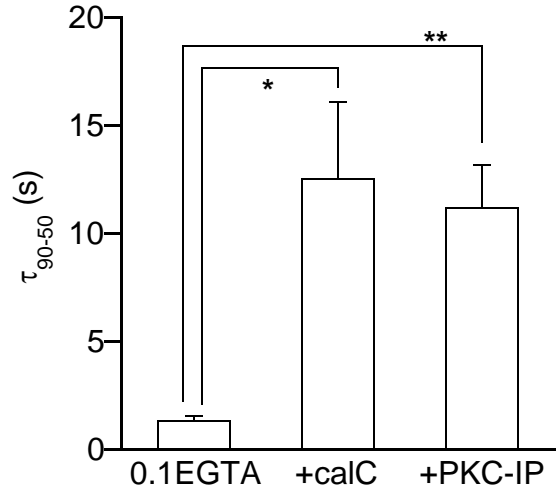

C

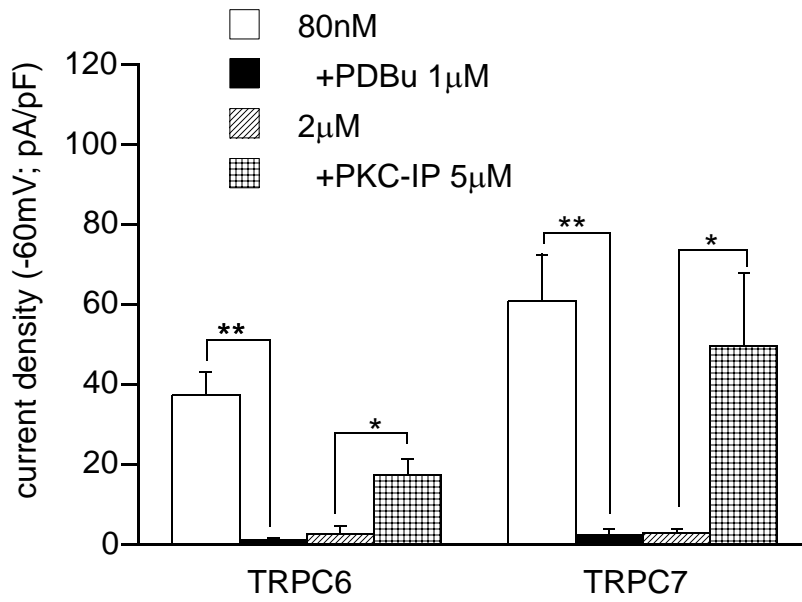

Supplement: jphysiol_2004.075051_2.pdf [file jphysiol_2004.075051_2.pdf]
